# Supplementary material
Source: PubMed Central journal article supplement (PMC7416537)
Supplement: ehp6517.s001.acco.pdf [file ehp6517.s001.acco.pdf]

**Note to readers with disabilities:** *EHP* strives to ensure that all journal content is accessible to all readers. However, some figures and Supplemental Material published in *EHP* articles may not conform to [508 standards](#) due to the complexity of the information being presented. If you need assistance accessing journal content, please contact [ehp508@niehs.nih.gov](mailto:ehp508@niehs.nih.gov). Our staff will work with you to assess and meet your accessibility needs within 3 working days.

### **Supplemental Material**

#### **Serum Perfluoroalkyl Substances, Vaccine Responses, and Morbidity in a Cohort of Guinea-Bissau Children**

Clara Amalie Gade Timmermann, Kristoffer Jarlov Jensen, Flemming Nielsen, Esben Budtz-Jørgensen, Fiona van der Klis, Christine Stabell Benn, Philippe Grandjean, and Ane Bærent Fisker

#### **Table of Contents**

**Table S1.** Odds ratio for presence of fever, coughing, diarrhea, and any morbidity at inclusion and 9 months with a doubling of serum-PFAS concentrations at inclusion among boys and girls.

**Table S2.** Percent difference in measles antibody concentrations at inclusion, 9 months, and 2 years with a doubling of serum-PFAS concentrations at inclusion among boys and girls.

**Figure S1.** Predicted association between PFNA and measles antibody concentrations at inclusion based on the confounder adjusted model including both  $\log_{10}(\text{PFNA})$  and  $\log_{10}(\text{PFNA})$  squared, excluding highly influential observations ( $DFBETA > \frac{2}{\sqrt{N}}$ ).

## Supplementary material

Table S1: Odds ratio for presence of fever, coughing, diarrhea, and any morbidity at inclusion and 9 months with a doubling of serum-PFAS concentrations at inclusion among boys and girls.

|                         | Inclusion <sup>a</sup> |                   | 9 months <sup>a</sup> |                   |
|-------------------------|------------------------|-------------------|-----------------------|-------------------|
|                         | n/N                    | OR (95 % CI)      | n/N                   | OR (95 % CI)      |
| <b>Fever</b>            |                        |                   |                       |                   |
| <b>PFHxS</b>            |                        |                   |                       |                   |
| boys                    | 28/123                 | 1.15 (0.50, 2.66) | 8/123                 | 0.86 (0.20, 3.69) |
| girls                   | 19/113                 | 1.42 (0.73, 2.79) | 11/113                | 0.99 (0.40, 2.45) |
| p-value for interaction |                        | 0.70              |                       | 0.87              |
| <b>PFOS</b>             |                        |                   |                       |                   |
| boys                    | 28/123                 | 1.65 (0.93, 2.94) | 8/123                 | 1.40 (0.52, 3.77) |
| girls                   | 19/113                 | 1.07 (0.51, 2.24) | 11/113                | 1.05 (0.43, 2.55) |
| p-value for interaction |                        | 0.36              |                       | 0.67              |
| <b>PFOA</b>             |                        |                   |                       |                   |
| boys                    | 28/123                 | 1.06 (0.56, 1.99) | 8/123                 | 1.48 (0.48, 4.56) |
| girls                   | 19/113                 | 0.73 (0.30, 1.76) | 11/113                | 1.77 (0.60, 5.17) |
| p-value for interaction |                        | 0.50              |                       | 0.82              |
| <b>PFNA</b>             |                        |                   |                       |                   |
| boys                    | 28/123                 | 1.65 (1.00, 2.72) | 8/123                 | 1.09 (0.52, 2.27) |
| girls                   | 19/112                 | 0.88 (0.48, 1.60) | 11/112                | 1.35 (0.62, 2.96) |
| p-value for interaction |                        | 0.12              |                       | 0.69              |
| <b>PFDA</b>             |                        |                   |                       |                   |
| boys                    | 28/123                 | 1.49 (0.78, 2.86) | 8/123                 | 1.59 (0.53, 4.74) |
| girls                   | 19/113                 | 1.48 (0.64, 3.43) | 11/113                | 0.91 (0.33, 2.50) |
| p-value for interaction |                        | 0.99              |                       | 0.46              |
| <b>PFUnDA</b>           |                        |                   |                       |                   |
| boys                    | 28/123                 | 1.43 (0.69, 2.97) | 8/123                 | 0.82 (0.28, 2.40) |
| girls                   | 19/113                 | 1.20 (0.64, 2.26) | 11/113                | 0.59 (0.18, 2.00) |
| p-value for interaction |                        | 0.72              |                       | 0.70              |
| <b>Coughing</b>         |                        |                   |                       |                   |
| <b>PFHxS</b>            |                        |                   |                       |                   |
| boys                    | 37/123                 | 1.20 (0.56, 2.55) | 19/123                | 1.13 (0.43, 3.00) |
| girls                   | 34/113                 | 1.34 (0.75, 2.41) | 13/114                | 3.68 (1.41, 9.64) |
| p-value for interaction |                        | 0.82              |                       | 0.09              |
| <b>PFOS</b>             |                        |                   |                       |                   |
| boys                    | 37/123                 | 0.99 (0.60, 1.62) | 19/123                | 1.52 (0.78, 2.96) |
| girls                   | 34/113                 | 1.03 (0.56, 1.88) | 13/114                | 1.57 (0.69, 3.61) |
| p-value for interaction |                        | 0.92              |                       | 0.95              |
| <b>PFOA</b>             |                        |                   |                       |                   |
| boys                    | 37/123                 | 1.16 (0.65, 2.05) | 19/123                | 1.40 (0.66, 2.98) |
| girls                   | 34/113                 | 0.94 (0.48, 1.84) | 13/114                | 3.17 (1.13, 8.92) |
| p-value for interaction |                        | 0.64              |                       | 0.21              |
| <b>PFNA</b>             |                        |                   |                       |                   |
| boys                    | 37/123                 | 0.95 (0.63, 1.44) | 19/123                | 1.28 (0.75, 2.19) |
| girls                   | 34/112                 | 1.24 (0.76, 2.02) | 13/113                | 1.46 (0.72, 2.96) |
| p-value for interaction |                        | 0.42              |                       | 0.78              |
| <b>PFDA</b>             |                        |                   |                       |                   |

|                         |        |                   |        |                   |
|-------------------------|--------|-------------------|--------|-------------------|
| boys                    | 37/123 | 0.75 (0.41, 1.37) | 19/123 | 1.41 (0.66, 3.00) |
| girls                   | 34/113 | 0.80 (0.39, 1.62) | 13/114 | 0.86 (0.32, 2.32) |
| p-value for interaction |        | 0.91              |        | 0.44              |
| <b>PFUnDA</b>           |        |                   |        |                   |
| boys                    | 37/123 | 1.25 (0.66, 2.35) | 19/123 | 0.98 (0.43, 2.23) |
| girls                   | 34/113 | 0.66 (0.31, 1.38) | 13/114 | 1.02 (0.48, 2.15) |
| p-value for interaction |        | 0.20              |        | 0.94              |

#### Diarrhea

|                         |        |                   |        |                   |
|-------------------------|--------|-------------------|--------|-------------------|
| <b>PFHxS</b>            |        |                   |        |                   |
| boys                    | 18/123 | 1.00 (0.36, 2.76) | 15/123 | 1.53 (0.50, 4.71) |
| girls                   | 9/113  | 1.45 (0.65, 3.24) | 7/114  | 1.61 (0.70, 3.73) |
| p-value for interaction |        | 0.57              |        | 0.94              |
| <b>PFOS</b>             |        |                   |        |                   |
| boys                    | 18/123 | 1.55 (0.78, 3.05) | 15/123 | 1.74 (0.75, 4.03) |
| girls                   | 9/113  | 0.59 (0.21, 1.62) | 7/114  | 0.55 (0.16, 1.83) |
| p-value for interaction |        | 0.12              |        | 0.12              |
| <b>PFOA</b>             |        |                   |        |                   |
| boys                    | 18/123 | 1.22 (0.57, 2.62) | 15/123 | 1.56 (0.63, 3.86) |
| girls                   | 9/113  | 0.80 (0.23, 2.72) | 7/114  | 1.50 (0.38, 5.88) |
| p-value for interaction |        | 0.56              |        | 0.96              |
| <b>PFNA</b>             |        |                   |        |                   |
| boys                    | 18/123 | 1.23 (0.72, 2.11) | 15/123 | 1.29 (0.70, 2.39) |
| girls                   | 9/112  | 0.52 (0.22, 1.23) | 7/113  | 1.07 (0.43, 2.65) |
| p-value for interaction |        | 0.10              |        | 0.74              |
| <b>PFDA</b>             |        |                   |        |                   |
| boys                    | 18/123 | 1.66 (0.76, 3.59) | 15/123 | 1.81 (0.71, 4.56) |
| girls                   | 9/113  | 0.35 (0.10, 1.20) | 7/114  | 0.48 (0.13, 1.86) |
| p-value for interaction |        | 0.04              |        | 0.11              |
| <b>PFUnDA</b>           |        |                   |        |                   |
| boys                    | 18/123 | 1.58 (0.67, 3.70) | 15/123 | 1.20 (0.45, 3.21) |
| girls                   | 9/113  | 0.36 (0.09, 1.46) | 7/114  | 0.52 (0.11, 2.35) |
| p-value for interaction |        | 0.08              |        | 0.36              |

#### Any morbidity <sup>b</sup>

|                         |        |                   |        |                   |
|-------------------------|--------|-------------------|--------|-------------------|
| <b>PFHxS</b>            |        |                   |        |                   |
| boys                    | 49/122 | 1.39 (0.68, 2.85) | 28/123 | 1.60 (0.69, 3.71) |
| girls                   | 50/113 | 1.27 (0.72, 2.26) | 24/113 | 1.98 (0.98, 4.03) |
| p-value for interaction |        | 0.85              |        | 0.70              |
| <b>PFOS</b>             |        |                   |        |                   |
| boys                    | 49/122 | 1.58 (0.97, 2.58) | 28/123 | 1.58 (0.88, 2.82) |
| girls                   | 50/113 | 0.73 (0.42, 1.27) | 24/113 | 1.13 (0.58, 2.17) |
| p-value for interaction |        | 0.04              |        | 0.45              |
| <b>PFOA</b>             |        |                   |        |                   |
| boys                    | 49/122 | 1.31 (0.76, 2.25) | 28/123 | 1.82 (0.93, 3.58) |
| girls                   | 50/113 | 0.74 (0.39, 1.39) | 24/113 | 2.34 (1.05, 5.20) |
| p-value for interaction |        | 0.18              |        | 0.64              |
| <b>PFNA</b>             |        |                   |        |                   |
| boys                    | 49/122 | 1.13 (0.77, 1.67) | 28/123 | 1.21 (0.77, 1.92) |
| girls                   | 50/112 | 0.91 (0.58, 1.43) | 24/112 | 1.25 (0.72, 2.17) |
| p-value for interaction |        | 0.47              |        | 0.93              |
| <b>PFDA</b>             |        |                   |        |                   |

|                         |        |                   |        |                   |
|-------------------------|--------|-------------------|--------|-------------------|
| boys                    | 49/122 | 1.39 (0.80, 2.44) | 28/123 | 1.63 (0.84, 3.16) |
| girls                   | 50/113 | 0.61 (0.31, 1.19) | 24/113 | 0.85 (0.40, 1.84) |
| p-value for interaction |        | 0.07              |        | 0.21              |
| <b>PFUnDA</b>           |        |                   |        |                   |
| boys                    | 49/122 | 1.69 (0.90, 3.15) | 28/123 | 1.00 (0.50, 2.02) |
| girls                   | 50/113 | 0.59 (0.30, 1.16) | 24/113 | 0.84 (0.42, 1.68) |
| p-value for interaction |        | 0.03              |        | 0.72              |

<sup>a</sup> Adjusted for weight (to nearest 10 g) and age (days) at inclusion, maternal education (none/any/unknown), and breastfeeding without solids (inclusion: yes/no, 9 months: duration in days).

<sup>b</sup> Fever, diarrhea, coughing or vomiting.

Table S2: Percent difference in measles antibody concentrations at inclusion, 9 months, and 2 years with a doubling of serum-PFAS concentrations at inclusion among boys and girls.

|                         | Measles antibody concentration |                        |                                 |                        |                                      |                        |                                |                        |                                     |                        |
|-------------------------|--------------------------------|------------------------|---------------------------------|------------------------|--------------------------------------|------------------------|--------------------------------|------------------------|-------------------------------------|------------------------|
|                         | Inclusion <sup>a</sup>         |                        | 9 months – control <sup>a</sup> |                        | 9 months – intervention <sup>b</sup> |                        | 2 years – control <sup>b</sup> |                        | 2 years – intervention <sup>b</sup> |                        |
|                         | (no measles vaccine)           |                        | (no measles vaccine)            |                        | (1 measles vaccine)                  |                        | (1 measles vaccine)            |                        | (2 measles vaccines)                |                        |
|                         | N                              | % difference (95 % CI) | N                               | % difference (95 % CI) | N                                    | % difference (95 % CI) | N                              | % difference (95 % CI) | N                                   | % difference (95 % CI) |
| <b>PFHxS</b>            |                                |                        |                                 |                        |                                      |                        |                                |                        |                                     |                        |
| boys                    | 123                            | 1 (-29, 43)            | 46                              | -18 (-53, 42)          | 75                                   | 10 (-31, 74)           | 46                             | -9 (-42, 44)           | 54                                  | -20 (-45, 16)          |
| girls                   | 113                            | -8 (-30, 21)           | 54                              | 15 (-30, 91)           | 58                                   | 7 (-23, 49)            | 54                             | -32 (-54, 2)           | 37                                  | 21 (-14, 71)           |
| p-value for interaction |                                | 0.68                   |                                 | 0.35                   |                                      | 0.93                   |                                | 0.34                   |                                     | 0.11                   |
| <b>PFOS</b>             |                                |                        |                                 |                        |                                      |                        |                                |                        |                                     |                        |
| boys                    | 123                            | -10 (-29, 13)          | 46                              | -37 (-56, -8)          | 75                                   | -23 (-42, 3)           | 46                             | 22 (-11, 66)           | 54                                  | -8 (-27, 16)           |
| girls                   | 113                            | -16 (-36, 10)          | 54                              | -13 (-41, 30)          | 58                                   | -19 (-45, 17)          | 54                             | -28 (-48, -1)          | 37                                  | 9 (-22, 52)            |
| p-value for interaction |                                | 0.71                   |                                 | 0.23                   |                                      | 0.87                   |                                | 0.02                   |                                     | 0.42                   |
| <b>PFOA</b>             |                                |                        |                                 |                        |                                      |                        |                                |                        |                                     |                        |
| boys                    | 123                            | -17 (-36, 8)           | 46                              | -19 (-47, 23)          | 75                                   | 10 (-21, 54)           | 46                             | -7 (-34, 30)           | 54                                  | -7 (-27, 19)           |
| girls                   | 113                            | -5 (-30, 29)           | 54                              | -3 (-40, 54)           | 58                                   | 18 (-22, 78)           | 54                             | -21 (-46, 15)          | 37                                  | 28 (-6, 75)            |
| p-value for interaction |                                | 0.50                   |                                 | 0.57                   |                                      | 0.79                   |                                | 0.51                   |                                     | 0.11                   |
| <b>PFNA</b>             |                                |                        |                                 |                        |                                      |                        |                                |                        |                                     |                        |
| boys                    | 123                            | -12 (-27, 7)           | 46                              | -15 (-36, 12)          | 75                                   | 3 (-20, 34)            | 46                             | 8 (-14, 36)            | 54                                  | 1 (-16, 23)            |
| girls                   | 112                            | -7 (-26, 16)           | 54                              | -1 (-28, 37)           | 57                                   | -17 (-41, 17)          | 54                             | -16 (-35, 9)           | 37                                  | 8 (-19, 43)            |
| p-value for interaction |                                | 0.73                   |                                 | 0.49                   |                                      | 0.32                   |                                | 0.15                   |                                     | 0.72                   |
| <b>PFDA</b>             |                                |                        |                                 |                        |                                      |                        |                                |                        |                                     |                        |
| boys                    | 123                            | -16 (-36, 11)          | 46                              | -39 (-60, -7)          | 75                                   | -31 (-52, -2)          | 46                             | 17 (-18, 67)           | 54                                  | 8 (-21, 47)            |
| girls                   | 113                            | -10 (-34, 23)          | 54                              | 2 (-33, 55)            | 58                                   | -13 (-45, 38)          | 54                             | -19 (-43, 14)          | 37                                  | 5 (-30, 57)            |
| p-value for interaction |                                | 0.77                   |                                 | 0.08                   |                                      | 0.42                   |                                | 0.14                   |                                     | 0.91                   |
| <b>PFUnDA</b>           |                                |                        |                                 |                        |                                      |                        |                                |                        |                                     |                        |
| boys                    | 123                            | -6 (-29, 25)           | 46                              | -19 (-45, 20)          | 75                                   | -40 (-61, -7)          | 46                             | 12 (-18, 54)           | 54                                  | 3 (-28, 48)            |
| girls                   | 113                            | -12 (-33, 15)          | 54                              | 39 (-19, 137)          | 58                                   | -9 (-33, 24)           | 54                             | -7 (-41, 45)           | 37                                  | -11 (-45, 43)          |
| p-value for interaction |                                | 0.73                   |                                 | 0.11                   |                                      | 0.13                   |                                | 0.49                   |                                     | 0.62                   |

<sup>a</sup> Analyses of pre-vaccination antibody concentrations were adjusted for weight (to nearest 10g) and age (days) at inclusion, maternal education (none/any/unknown), breastfeeding without solids (inclusion: yes/no, 9 months: duration in days), maternal measles antibody concentration (IU/mL).

<sup>b</sup> Analyses of post-vaccination antibody concentrations were adjusted for maternal education (none/any/unknown), duration of breastfeeding without solids (duration in days), measles antibody concentration at previous visit (IU/mL, log-transformed), and time from vaccination to blood sampling (days).

Figure S1: Predicted association between PFNA and measles antibody concentrations at inclusion based on the confounder adjusted model including both  $\log_{10}(\text{PFNA})$  and  $\log_{10}(\text{PFNA})$  squared, excluding highly influential observations ( $df \text{ beta} > 2/\sqrt{N}$ ).

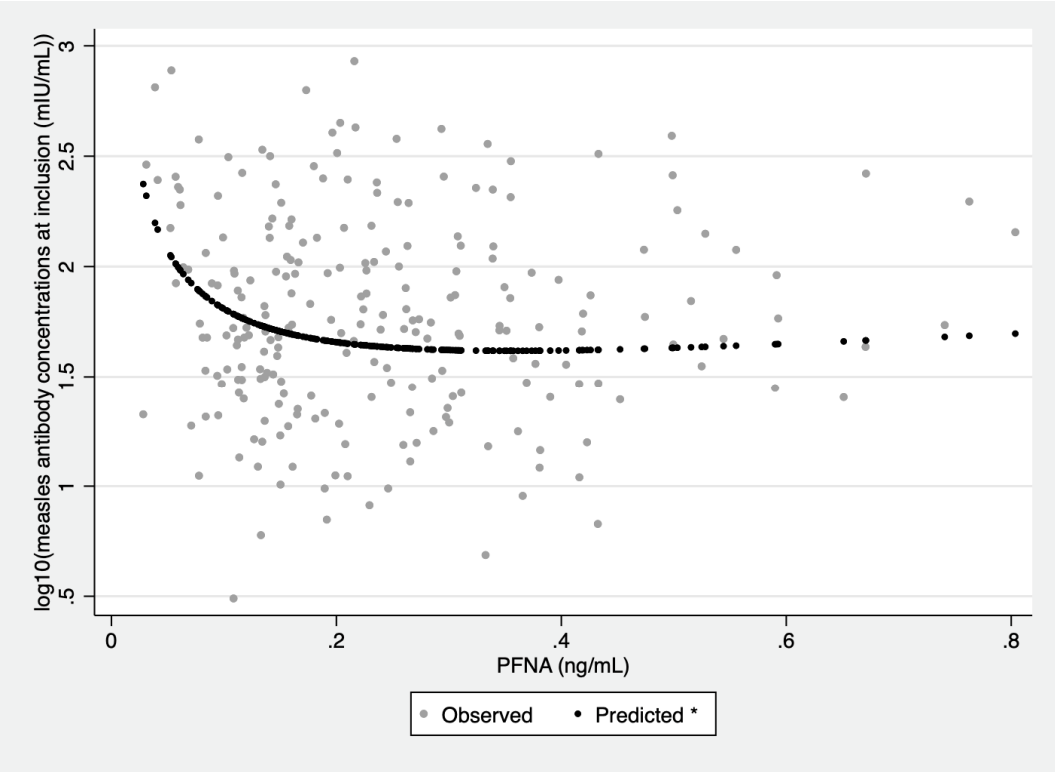

\* Prediction was based on mothers with an education that were breastfeeding without solids at inclusion. Maternal antibody concentrations, child weight and age were set to their median.
