# Supplementary material
Source: PubMed Central journal article supplement (PMC7416537)
Supplement: ehp6517.smcontents.508.pdf [file ehp6517.smcontents.508.pdf]

**Note to readers with disabilities:** *EHP* strives to ensure that all journal content is accessible to all readers. However, some figures and Supplemental Material published in *EHP* articles may not conform to [508 standards](#) due to the complexity of the information being presented. If you need assistance accessing journal content, please contact [ehp508@niehs.nih.gov](mailto:ehp508@niehs.nih.gov). Our staff will work with you to assess and meet your accessibility needs within 3 working days.

### **Supplemental Material**

#### **Serum Perfluoroalkyl Substances, Vaccine Responses, and Morbidity in a Cohort of Guinea-Bissau Children**

Clara Amalie Gade Timmermann, Kristoffer Jarlov Jensen, Flemming Nielsen, Esben Budtz-Jørgensen, Fiona van der Klis, Christine Stabell Benn, Philippe Grandjean, and Ane Bærent Fisker

#### **Table of Contents**

**Table S1.** Odds ratio for presence of fever, coughing, diarrhea, and any morbidity at inclusion and 9 months with a doubling of serum-PFAS concentrations at inclusion among boys and girls.

**Table S2.** Percent difference in measles antibody concentrations at inclusion, 9 months, and 2 years with a doubling of serum-PFAS concentrations at inclusion among boys and girls.

**Figure S1.** Predicted association between PFNA and measles antibody concentrations at inclusion based on the confounder adjusted model including both  $\log_{10}(\text{PFNA})$  and  $\log_{10}(\text{PFNA})$  squared, excluding highly influential observations ( $DFBETA > \frac{2}{\sqrt{N}}$ ).
